# Supplementary material
Source: Springer Nature journal article supplement (https://www.springermedizin.de/resource/supplementary/12916_2006_91_MOESM1_ESM.pdf/9599156)

A

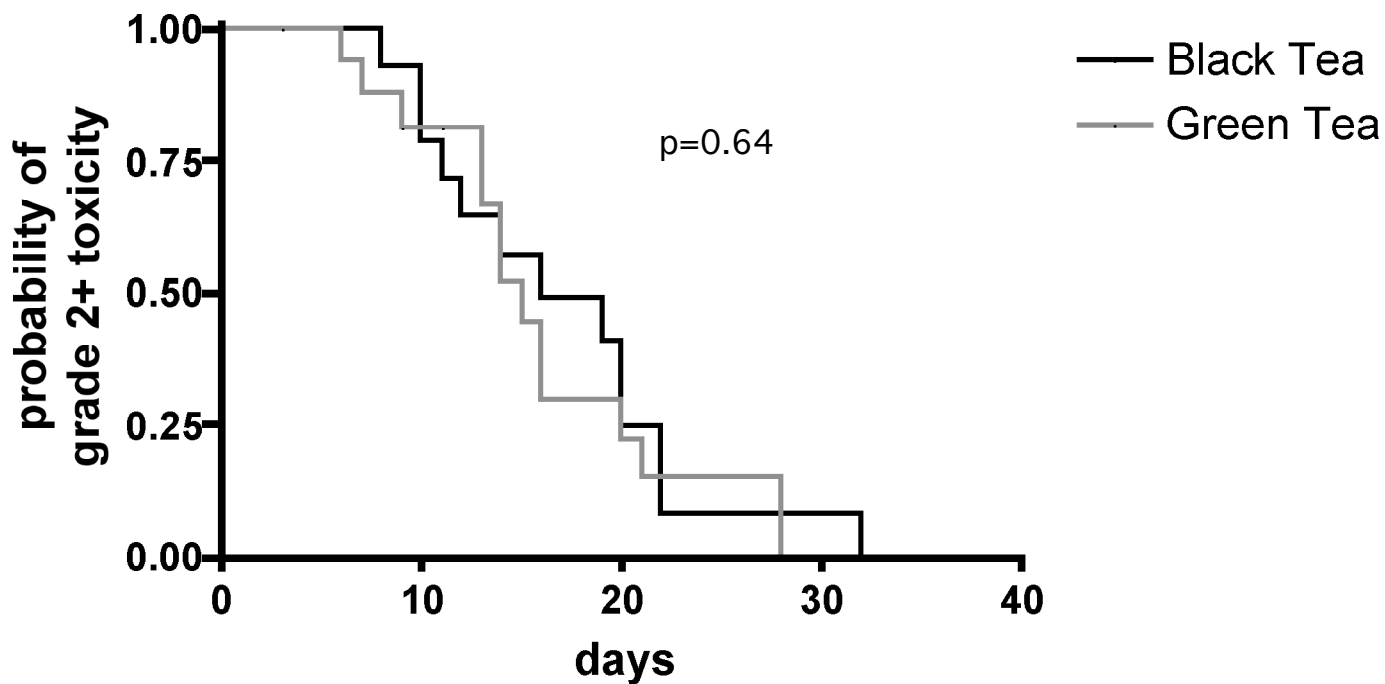

B

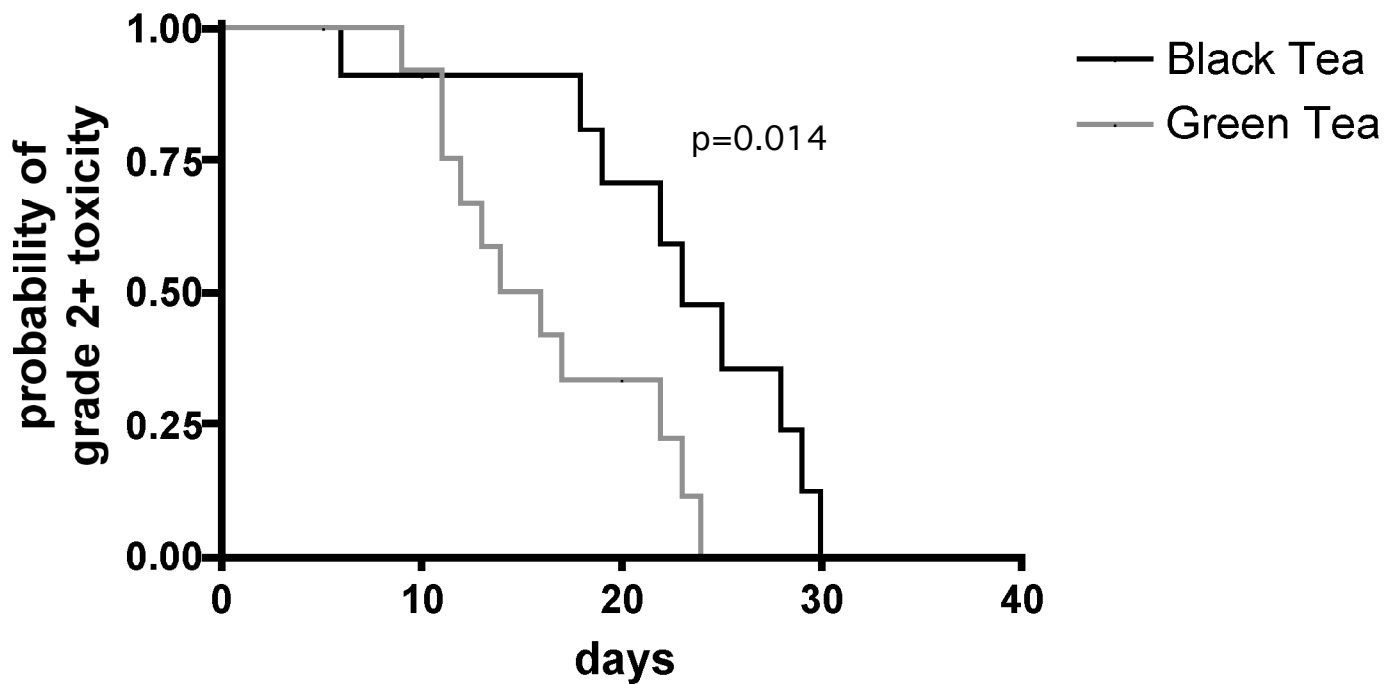

Supplement: MOESM1 [file 9599156]
